# Supplementary material
Source: PubMed Central journal article supplement (PMC2636623)
Supplement: NIHMS81491-supplement-2.pdf [file NIHMS81491-supplement-2.pdf]

**Association of Gene Variants with Incident Myocardial Infarction in the  
Cardiovascular Health Study**

Dov Shiffman, Ellen S O’Meara, Lance A Bare, Charles M Rowland, Judy Z Louie,  
Andre R Arellano, Thomas Lumley, Kenneth Rice, Olga Iakoubova, May M Luke,  
Bradford A Young, Mary J Malloy, John P Kane, Stephen G Ellis, Russell P Tracy,  
James J Devlin, Bruce M Psaty

**Contents**

|                                         |        |
|-----------------------------------------|--------|
| Genotype determination                  | Page 2 |
| Antecedent Studies                      | 7      |
| Prespecification of prior probabilities | 9      |
| Table I                                 | 12     |
| Table II                                | 15     |
| Table III                               | 17     |
| Table IV                                | 22     |
| Table V                                 | 26     |

**Online Only Supplementary Text: Genotype Determination***DNA isolation*

DNA was isolated from peripheral blood leukocytes collected at baseline and stored as buffy coats at -80°C using a standard salt precipitation method<sup>1</sup>. In addition, some DNA was isolated using the Gentra Puregene DNA purification kit (Gentra Systems 13355 10th Ave North, Suite 120 Minneapolis, Minnesota 55441) from peripheral blood leukocytes collected at follow up examinations and stored as buffy coats at -80°C. DNA stock solutions were stored at -80°C.

*Multiplex Genotyping*

Genotypes of the CHS participants were determined using a genotyping method that included the following steps: multiplex PCR, allele-specific oligonucleotide ligation assays (OLA), hybridization to conjugated Luminex®100TM xMAP microspheres (Luminex, Austin, TX, USA), labeling with streptavidin-R-phycoerythrin, and detection on the Luminex®100TM flow cytometer instrument (Luminex, Austin, TX, USA).

*Multiplex PCR*

For each DNA sample, genomic regions (100bp to 150bp long) containing the target SNPs were simultaneously amplified using multiplex PCR<sup>2</sup>. 15µL PCR reactions were assembled using the following reagents: 2.5µL of pooled (1.2µM each) PCR primers (all oligonucleotides were obtained from Integrated DNA Technologies, Coralville, IA, USA), 1.5µL of 10X PCR buffer (150mM Tris-HCl pH 8.25; 500mM KCl; 40mM MgCl<sub>2</sub>; 1mM dATP, dCTP, and dGTP; 0.5mM dTTP; 3mM dUTP; and 0.2% Triton X-

100), 0.5 units of AmpErase™ UNG (Applied Biosystems, Foster City, CA, USA), 5 units of Amplitaq Gold™ (Applied Biosystems, Foster City, CA, USA), and 3ng of genomic DNA. Thermalcycling was performed in a GeneAmp® PCR System 9700 (Applied Biosystems, Foster City, CA, USA) as follows: first, incubation for 2 min at 50°C; second, incubation for 12 min at 95°C; third, 28 cycles (ramp setting 9600) of 15s at 95°C, 15s at 58°C, and 45s at 72°C; fourth, incubation for 7 min at 72°C; fifth, incubation for 30 min at 99°C and finally storage at 4°C.

#### *Allele-specific oligonucleotide ligation*

SNP alleles in each of the amplified regions were detected using multiplex OLA<sup>3</sup>. OLA reactions were assembled as follows: to each 15µl of multiplex PCR reaction from the previous step we added 5µL of OLA reaction mix, which contained 1µL of pooled (0.1µM each) allele-specific oligonucleotides (2 for each SNP), 1µL of pooled (0.2µM-0.8µM each) 3 prime biotinylated oligonucleotides that were to be ligated to the allele-specific oligonucleotides (1 for each SNP), 2µL of 10X OLA buffer (150mM Tris pH 6.7, 100mM MgCl<sub>2</sub>, 750mM KCl, 100mM DTT, 10mM NAD, 1% Triton X-100), and 20 units of *rTth* thermostable DNA ligase (Abbott Labs, Abbott Park, IL, USA).

Thermalcycling was performed in a GeneAmp® PCR System 9700 as follows: 24 cycles (ramp setting 9600) of 5s at 95.5°C and 2 minutes at 50°C. After thermocycling, the reaction was incubated for 10 min at 99°C and finally stored at 4°C.

#### *Hybridization to conjugated Luminex®100™ xMAP microspheres*

The 5 prime end of each allele-specific oligonucleotide was designed to have a unique sequence that was complementary to one of 100 distinct types of capture oligonucleotides. Capture oligonucleotides were conjugated<sup>4</sup> to microspheres, such that each class of 100 spectrally distinct Luminex®100TM xMAP microsphere classes<sup>5</sup> was conjugated to one type of distinct capture oligonucleotides. The ligation products from the OLA step were hybridized with these conjugated Luminex®100TM xMAP microspheres by adding a 40µL of hybridization solution to the 20µL OLA reaction from the previous step. This 40µL of hybridization solution contained 1000 microspheres of each of the 100 different conjugated microsphere classes (a total of 100,000 microspheres) in hybridization buffer (20mM Tris-HCl pH 8, 20mM MgCl<sub>2</sub>, 300mM NaCl, 0.1% Tween 20 with 0.09% (w/v) NaN<sub>3</sub>). The hybridization reaction was carried out by incubation for 30 minutes at 55°C.

#### *Labeling with streptavidin R-phycoerythrin*

The ligation products that had been specifically captured in the previous hybridization step were fluorescently labeled by adding to the hybridization reaction from the previous step a 15µL solution containing 1µg PhycoLink® streptavidin-R-phycoerythrin (Prozyme, San Leandro, CA, USA), 10mM Tris-HCl pH 8, 10mM MgCl<sub>2</sub>, 150mM NaCl, 0.05% Tween 20 with 0.09% (w/v) NaN<sub>3</sub> and incubating for 15 minutes at 45°C. The reaction was then stored at room temperature for up to 8 hours before data collection.

#### *Detection on the Luminex®100TM flow cytometer instrument*

Genotyping data was collected using the Luminex®100TM instrument<sup>5</sup> at 45°C. The Luminex®100TM instrument sampled 50µL per reaction well and analyzed a minimum of 100 microspheres of each microsphere class in the sample, and the median fluorescent intensity was reported.

#### *Genotyping Accuracy*

Genotyping accuracy of this methodology has been assessed in three previous studies by comparing genotype calls from the multiplex OLA assays to those from real time kinetic PCR assays for the same SNPs, and the overall concordance of the genotype calls from these two methods was >99% in each of these studies<sup>6-8</sup>.

#### *References*

1. Miller SA, Dykes DD, Polesky HF. A simple salting out procedure for extracting DNA from human nucleated cells. *Nucleic Acids Res.* 1988;16:1215.
2. *PCR Applications: Protocols for Functional Genomics.* San Diego: Academic Press; 1999.
3. Barany F. Genetic disease detection and DNA amplification using cloned thermostable ligase. *Proc Natl Acad Sci U S A.* 1991;88:189-193.
4. Fulton RJ, McDade RL, Smith PL, Kienker LJ, Kettman JR Jr. Advanced multiplexed analysis with the FlowMetrix system. *Clin Chem.* 1997;43:1749-1756.
5. Dunbar SA. Applications of Luminex xMAP technology for rapid, high-throughput multiplexed nucleic acid detection. *Clin Chim Acta.* 2006;363:71-82.

6. Shiffman D, Ellis SG, Rowland CM, Malloy MJ, Luke MM, Iakoubova OA, Pullinger CR, Cassano J, Aouizerat BE, Fenwick RG, Reitz RE, Catanese JJ, Leong DU, Zellner C, Sninsky JJ, Topol EJ, Devlin JJ, Kane JP. Identification of four gene variants associated with myocardial infarction. *Am J Hum Genet.* 2005;77:596-605.
7. Shiffman D, Rowland CM, Louie JZ, Luke MM, Bare LA, Bolonick JI, Young BA, Catanese JJ, Stiggins CF, Pullinger CR, Topol EJ, Malloy MJ, Kane JP, Ellis SG, Devlin JJ. Gene variants of VAMP8 and HNRPUL1 are associated with early-onset myocardial infarction. *Arterioscler Thromb Vasc Biol.* 2006;26:1613-1618.
8. Iakoubova OA, Tong CH, Chokkalingam AP, Rowland CM, Kirchgessner TG, Louie JZ, Ploughman LM, Sabatine MS, Campos H, Catanese JJ, Leong DU, Young BA, Lew D, Tsuchihashi Z, Luke MM, Packard CJ, Zerba KE, Shaw PM, Shepherd J, Devlin JJ, Sacks FM. Asp92Asn polymorphism in the myeloid IgA Fc receptor is associated with myocardial infarction in two disparate populations: CARE and WOSCOPS. *Arterioscler Thromb Vasc Biol.* 2006;26:2763-2768.

**Online Only Supplementary Text: Antecedent studies**

The patient characteristics of the 2 case–control studies of MI are summarized in online Data Supplement Table II. One study of MI comprised 793 cases and 1000 controls that were enrolled between July 1989 and May 2005 by UCSF Genomic Resource in Arteriosclerosis. Participants included patients who underwent diagnostic or interventional cardiac catheterization, patients of the UCSF Lipid Clinic and healthy individuals. Cases had a history of MI. Controls had no history of MI, diabetes or symptomatic vascular disease. The other study of MI comprised 475 cases and 619 controls that were patients of CCF Heart Center and had undergone diagnostic or interventional cardiac catheterization between July 2001 and March 2003. Cases had a history of MI. Controls had no history of MI, and had less than 50% coronary luminal narrowing based on clinical angiography. This CCF study is similar to a study that was previously described (Study-2 in Shiffman et al.<sup>1</sup>).

All subjects in the antecedent studies were self–described non-Hispanic whites who had completed an Institutional Review Board approved questionnaire and given informed consent to participate in genetic studies.

The 65 SNPs with evidence for association in these 2 case–control studies were selected from a set of 16,339 SNPs that had been tested for association with MI.

1. Shiffman D, Ellis SG, Rowland CM, Malloy MJ, Luke MM, Iakoubova OA, Pullinger CR, Cassano J, Aouizerat BE, Fenwick RG, Reitz RE, Catanese JJ, Leong DU, Zellner C, Sninsky JJ, Topol EJ, Devlin JJ, Kane JP. Identification of four gene variants associated with myocardial infarction. *Am J Hum Genet.* 2005;77:596-605.



**Online Only Supplementary Text: Prespecification of prior probabilities for SNPs investigated in CHS**

The range of prior probabilities for the SNPs in *VAMP8*, *ROS1* (2 SNPs), *TAS2R50*, *OR13G1*, and *PALLD* (rs12510359) was based on previously published false discovery rates. These SNPs were associated with MI in 3 case–control studies, with a false discovery rate of  $<0.1$  in the third study.<sup>1,2</sup> Therefore, since the false discovery rate is  $<0.1$ , we used prior probabilities that ranged from 0.09 to 0.9. The *KIF6* SNP (rs20455) was associated with CHD in the placebo arms of two CHD prevention trials and the association remained significant after a Bonferroni correction for multiple testing.<sup>3</sup> Therefore, since the significance threshold was 0.05, we used prior probabilities that ranged from 0.095 to 0.95. Similarly, the SNP in *LPA* gene (rs3798220) was assigned a prior probability range of 0.095 to 0.95 because it was associated with CHD in three case–control studies and remained significant after a Bonferroni correction for multiple testing in the third study.<sup>4</sup> The remaining 65 SNPs fall into 3 categories corresponding to the number of studies in which they were found to be associated with CHD. For the SNPs in these 3 categories we assigned a range of prior probabilities based on point estimates of 0.003, 0.03 and 0.3 for SNPs that were found to be associated in 1, 2 or 3 studies respectively (counting the 2 antecedent MI case–control studies described here, and ARIC,<sup>5</sup> provided the same risk allele was found in all studies; none of these studies adjusted for multiple hypothesis testing). We arrived at this point estimate by assuming that 1 out of 3,000 functional SNPs (mainly non-synonymous in these studies) confers a measurable risk of CHD and that each of the studies resulted in a 10 fold enrichment of

true positive SNPs. We then assigned a range that extended ten fold higher and ten fold lower from this point estimate.

1. Shiffman D, Ellis SG, Rowland CM, Malloy MJ, Luke MM, Iakoubova OA, Pullinger CR, Cassano J, Aouizerat BE, Fenwick RG, Reitz RE, Catanese JJ, Leong DU, Zellner C, Sninsky JJ, Topol EJ, Devlin JJ, Kane JP. Identification of four gene variants associated with myocardial infarction. *Am J Hum Genet.* 2005;77:596-605.
2. Shiffman D, Rowland CM, Louie JZ, Luke MM, Bare LA, Bolonick JI, Young BA, Catanese JJ, Stiggins CF, Pullinger CR, Topol EJ, Malloy MJ, Kane JP, Ellis SG, Devlin JJ. Gene Variants of VAMP8 and HNRPUL1 Are Associated With Early-Onset Myocardial Infarction. *Arterioscler Thromb Vasc Biol.* 2006;26:1613-1618.
3. Iakoubova OA, Tong CH, Rowland CM, Kirchgessner TG, Young BA, Arellano AR, Shiffman D, Sabatine MS, Campos H, Packard CJ, Pfeffer MA, White TJ, Braunwald E, Shepherd J, Devlin JJ, Sacks FM, MD. Association of the Trp719Arg Polymorphism in Kinesin-like Protein 6 with Myocardial Infarction and Coronary Heart Disease in Two Prospective Studies: The Cholesterol and Recurrent Events Study (CARE) and the West of Scotland Coronary Prevention Study (WOSCOPS) *J Amer Coll Cardiol.* 2007; in press.
4. Luke MM, Kane JP, Liu DM, Rowland CM, Shiffman D, Cassano J, Catanese JJ, Pullinger CR, Leong DU, Arellano AR, Tong CH, Movsesyan I, Naya-Vigne J, Noordhof C, Feric NT, Malloy MJ, Topol EJ, Koschinsky ML, Devlin JJ, Stephen G, Ellis SG. A Polymorphism in the Protease-like Domain of Apolipoprotein(a) is

Associated with Severe Coronary Artery Disease. *Arterioscler Thromb Vasc Biol.* 2007; online prior to publication.

5. Morrison AC, Bare LA, Chambless LE, Ellis SG, Malloy MJ, Kane JP, Pankow JS, Devlin JJ, Willerson JT, Boerwinkle E. Coronary heart disease risk prediction using a genetic risk score: the Atherosclerosis Risk in Communities (ARIC) Study. *Am J Epidemiol.* 2007;166:28-35.

**Online Supplement Table I. Prior evidence for 74 SNPs tested in CHS**

| Gene                             | SNP        | Prior evidence* | Prior model | Risk allele | Reference                                                                |       |        |       |      |       |        |       |
|----------------------------------|------------|-----------------|-------------|-------------|--------------------------------------------------------------------------|-------|--------|-------|------|-------|--------|-------|
| <i>Previously published Data</i> |            |                 |             |             |                                                                          |       |        |       |      |       |        |       |
| <i>KIF6</i>                      | rs20455    | A               | dom         | G           | <i>J Amer Coll Cardiol.</i> 2007; in press.                              |       |        |       |      |       |        |       |
| <i>LPA</i>                       | rs3798220  | A               | add         | C           | <i>Arterioscler Thromb Vasc Biol.</i> 2007; online prior to publication. |       |        |       |      |       |        |       |
| <i>OR13G1</i>                    | rs1151640  | A               | dom         | C           | <i>Am J Hum Genet.</i> 2005;77:596-605                                   |       |        |       |      |       |        |       |
| <i>PALLD</i>                     | rs12510359 | A               | rec         | G           | <i>Am J Hum Genet.</i> 2005;77:596-605                                   |       |        |       |      |       |        |       |
| <i>ROS1</i>                      | rs619203   | A               | add         | C           | <i>Am J Hum Genet.</i> 2005;77:596-605                                   |       |        |       |      |       |        |       |
| <i>ROS1</i>                      | rs529038   | A               | add         | T           | <i>Am J Hum Genet.</i> 2005;77:596-605                                   |       |        |       |      |       |        |       |
| <i>TAS2R50</i>                   | rs1376251  | A               | add         | C           | <i>Am J Hum Genet.</i> 2005;77:596-605                                   |       |        |       |      |       |        |       |
| <i>VAMP8</i>                     | rs1010     | A               | dom         | C           | <i>Arterioscler Thromb Vasc Biol.</i> 2006;26:1613-1618                  |       |        |       |      |       |        |       |
| <i>FCAR</i>                      | rs11666735 | C               | dom         | A           | <i>Arterioscler Thromb Vasc Biol.</i> 2006;26:2763-2768                  |       |        |       |      |       |        |       |
|                                  |            |                 |             |             | <b>CCF</b>                                                               |       |        |       |      |       |        |       |
|                                  |            |                 |             |             | <b>UCSF</b>                                                              |       |        |       |      |       |        |       |
| Gene                             | SNP        | Prior evidence* | Prior model | Risk allele | OR                                                                       | P     | Strata | Model | OR   | P     | Strata | Model |
| <i>MYH15</i>                     | rs3900940  | B               | rec         | C           | 2.08                                                                     | 0.029 | F      | rec   | 1.71 | 0.03  | F      | rec   |
| <i>PALLD</i>                     | rs7439293  | B               | add         | A           | 1.21                                                                     | 0.042 | ALL    | add   | 1.22 | 0.006 | ALL    | add   |
| <i>SNX19</i>                     | rs2298566  | B               | rec         | C           | 1.24                                                                     | 0.093 | ALL    | rec   | 1.21 | 0.05  | ALL    | rec   |
| <i>ALOX12B</i>                   | rs3027309  | C               | add         | T           | 1.27                                                                     | 0.035 | ALL    | add   | 1.18 | 0.068 | ALL    | add   |
| <i>AP3B1</i>                     | rs6453373  | C               | add         | T           | 1.54                                                                     | 0.029 | ALL    | add   | 1.26 | 0.094 | ALL    | add   |
| <i>AQP10</i>                     | rs6685323  | C               | add         | T           | 1.33                                                                     | 0.003 | ALL    | add   | 1.19 | 0.02  | ALL    | add   |
| <i>BAT2</i>                      | rs11538264 | C               | rec         | G           | 2.92                                                                     | 0.061 | F      | rec   | 1.87 | 0.055 | F      | rec   |
| <i>CALM1</i>                     | rs3814843  | C               | add         | G           | 1.65                                                                     | 0.018 | ALL    | add   | 1.97 | 0.01  | M      | add   |
| <i>COG2</i>                      | rs1051038  | C               | add         | A           | 1.23                                                                     | 0.063 | ALL    | add   | 1.19 | 0.088 | ALL    | rec   |
| <i>CYBRD1</i>                    | rs10455    | C               | add         | A           | 1.18                                                                     | 0.086 | ALL    | add   | 1.13 | 0.079 | ALL    | add   |
| <i>CYP17A1</i>                   | rs2486758  | C               | add         | C           | 1.37                                                                     | 0.02  | M      | add   | 1.25 | 0.067 | M      | add   |
| <i>CYP2C8</i>                    | rs10509681 | C               | rec         | T           | 1.31                                                                     | 0.091 | ALL    | rec   | 1.37 | 0.09  | F      | rec   |

|                  |               |   |     |   |      |        |     |     |      |        |     |     |
|------------------|---------------|---|-----|---|------|--------|-----|-----|------|--------|-----|-----|
| <i>DMXL2</i>     | rs12102203    | C | add | G | 1.38 | <0.001 | ALL | add | 1.18 | 0.014  | ALL | add |
| <i>EDG1</i>      | rs2038366     | C | add | G | 1.19 | 0.061  | ALL | add | 1.44 | 0.061  | M   | dom |
| <i>EIF2AK2</i>   | rs2307469     | C | add | C | 1.48 | 0.086  | ALL | add | 1.71 | 0.006  | ALL | add |
| <i>F13A1</i>     | rs5985        | C | add | A | 1.23 | 0.04   | ALL | add | 1.21 | 0.013  | ALL | add |
| <i>FCRLM2</i>    | rs34868416    | C | add | A | 1.37 | 0.043  | ALL | add | 1.32 | 0.024  | ALL | add |
| <i>GRM8</i>      | rs3808117     | C | add | T | 1.58 | <0.001 | ALL | add | 1.21 | 0.026  | ALL | add |
| <i>HPS1</i>      | rs2296436     | C | add | T | 1.36 | 0.054  | ALL | add | 1.32 | 0.095  | M   | add |
| <i>HPS1</i>      | rs1804689     | C | dom | T | 1.26 | 0.065  | ALL | dom | 1.25 | 0.02   | ALL | dom |
| <i>IL1F10</i>    | rs6761276     | C | add | T | 1.25 | 0.021  | ALL | add | 1.23 | 0.004  | ALL | add |
| <i>IL1F5</i>     | rs2515401     | C | add | T | 1.26 | 0.012  | ALL | add | 1.13 | 0.077  | ALL | add |
| <i>ITGAE</i>     | rs220479      | C | add | C | 1.36 | 0.036  | M   | add | 1.56 | 0.092  | ALL | dom |
| <i>KIAA1414</i>  | chr2:37081301 | C | add | G | 1.54 | 0.019  | ALL | add | 1.59 | 0.002  | ALL | add |
| <i>LGALS14</i>   | rs35541195    | C | add | T | 1.7  | 0.018  | F   | add | 1.78 | <0.001 | F   | add |
| <i>LOC391102</i> | rs943133      | C | add | A | 1.24 | 0.03   | ALL | add | 1.19 | 0.023  | ALL | add |
| <i>LOC651870</i> | rs3130210     | C | add | T | 1.24 | 0.037  | ALL | add | 1.29 | 0.002  | ALL | add |
| <i>LOC651870</i> | rs3129196     | C | add | A | 1.25 | 0.035  | ALL | add | 1.29 | 0.002  | ALL | add |
| <i>LY6G5B</i>    | rs11758242    | C | rec | C | 1.69 | 0.083  | ALL | rec | 1.51 | 0.034  | ALL | rec |
| <i>MKI67</i>     | rs10082504    | C | add | C | 1.38 | 0.034  | ALL | add | 1.26 | 0.043  | ALL | add |
| <i>MYOM3</i>     | rs12145360    | C | add | A | 1.36 | 0.069  | M   | add | 1.59 | 0.001  | M   | add |
| <i>None</i>      | rs2477037     | C | add | G | 1.31 | 0.021  | M   | add | 1.31 | 0.006  | M   | add |
| <i>None</i>      | rs2213948     | C | add | G | 1.61 | 0.019  | F   | add | 1.43 | 0.013  | F   | add |
| <i>P2RXL1</i>    | rs2277838     | C | add | A | 1.27 | 0.032  | ALL | add | 1.21 | 0.032  | ALL | add |
| <i>PGLYRP2</i>   | rs3813135     | C | dom | C | 1.25 | 0.095  | ALL | dom | 1.27 | 0.02   | ALL | dom |
| <i>PGLYRP2</i>   | rs892145      | C | dom | T | 1.29 | 0.048  | ALL | dom | 1.27 | 0.016  | ALL | dom |
| <i>PRKG1</i>     | rs211070      | C | add | G | 1.71 | 0.029  | ALL | add | 1.42 | 0.034  | ALL | add |
| <i>SERPINA9</i>  | rs17090921    | C | rec | A | 2.31 | 0.02   | F   | rec | 1.5  | 0.087  | F   | rec |
| <i>SLC39A7</i>   | rs35690712    | C | add | G | 1.55 | 0.06   | ALL | add | 1.42 | 0.024  | ALL | add |
| <i>STRN</i>      | rs11685600    | C | add | C | 1.78 | 0.014  | ALL | add | 1.39 | 0.061  | ALL | add |
| <i>TAF3</i>      | rs4747647     | C | add | A | 1.22 | 0.033  | ALL | add | 1.15 | 0.056  | ALL | add |
| <i>VTI1A</i>     | rs11814680    | C | add | A | 1.37 | 0.043  | M   | add | 1.26 | 0.018  | ALL | add |
| <i>WDR31</i>     | rs10817479    | C | add | G | 1.44 | 0.068  | ALL | add | 1.39 | 0.016  | ALL | add |

|                  |            |   |     |   |      |       |     |     |      |       |     |     |
|------------------|------------|---|-----|---|------|-------|-----|-----|------|-------|-----|-----|
| <i>WDR55</i>     | rs2286394  | C | add | T | 1.24 | 0.037 | ALL | add | 1.18 | 0.044 | ALL | add |
| <i>ABCG2</i>     | rs2231137  | D | add | C | 1.6  | 0.041 | ALL | add | 1.23 | 0.205 | ALL | Add |
| <i>ADAMTS1</i>   | rs428785   | D | add | C | 0.96 | 0.623 | M   | dom | 1.28 | 0.096 | M   | Dom |
| <i>ADAMTS1</i>   | rs402007   | D | add | C | 1.59 | 0.499 | M   | dom | 1.29 | 0.083 | M   | Dom |
| <i>DCC</i>       | rs1675225  | D | add | C | 0.78 | 0.763 | ALL | dom | 2.54 | 0.07  | ALL | dom |
| <i>FABP2</i>     | rs1799883  | D | add | T | 1.23 | 0.041 | ALL | add | 1.08 | 0.318 | ALL | add |
| <i>FSTL4</i>     | rs3749817  | D | add | G | 2.71 | 0.084 | F   | dom | 1.1  | 0.68  | ALL | dom |
| <i>FSTL4</i>     | rs13183672 | D | add | A | 1.19 | 0.088 | ALL | add | 1.1  | 0.24  | ALL | add |
| <i>GJA4</i>      | rs1764391  | D | add | C | 1.21 | 0.056 | ALL | add | 1.05 | 0.499 | ALL | add |
| <i>K6IRS4</i>    | rs592720   | D | add | G | 0.65 | 0.953 | ALL | dom | 1.42 | 0.074 | ALL | dom |
| <i>KRT5</i>      | rs89962    | D | add | T | 1.2  | 0.04  | ALL | add | 1.03 | 0.629 | ALL | add |
| <i>MCM10</i>     | rs7905784  | D | add | T | 1.25 | 0.079 | ALL | add | 1.03 | 0.746 | ALL | add |
| <i>MKI67</i>     | rs11016076 | D | add | C | 1.2  | 0.111 | ALL | add | 1.17 | 0.087 | ALL | add |
| <i>MLF1</i>      | rs4875     | D | add | C | 1.19 | 0.051 | ALL | add | 1.07 | 0.291 | ALL | add |
| <i>OR2A25</i>    | rs2961135  | D | add | G | 1.37 | 0.03  | ALL | dom | 1.14 | 0.238 | ALL | dom |
| <i>PONI</i>      | rs662      | D | add | C | 1.33 | 0.078 | F   | add | 0.83 | 0.96  | F   | add |
| <i>SERPINB8</i>  | rs1944270  | D | add | A | 1.24 | 0.355 | ALL | rec | 1.59 | 0.009 | ALL | rec |
| <i>SGIP1</i>     | rs1325268  | D | add | T | 1.08 | 0.425 | ALL | add | 1.15 | 0.056 | ALL | add |
| <i>SLC26A8</i>   | rs2295852  | D | add | C | 1.1  | 0.284 | ALL | add | 1.15 | 0.051 | ALL | add |
| <i>TMPRSS11B</i> | rs12331141 | D | add | T | 0.97 | 0.598 | ALL | add | 1.23 | 0.019 | ALL | add |
| <i>TOX</i>       | rs2290526  | D | add | G | 1.15 | 0.294 | ALL | add | 1.23 | 0.069 | ALL | add |
| <i>ZNF132</i>    | rs1122955  | D | add | C | 1.17 | 0.148 | ALL | add | 1.21 | 0.026 | ALL | add |

\* A – published data in a manuscript that corrected for multiple testing; B – evidence from 2 MI studies reported in this table and from ARIC (Morrison et al. *Am J Epidemiol.* 2007;166:28-35); C – evidence from 2 studies; D – evidence from only one of two studies reported in this table.

**Online Data Supplement Table II. Distribution of Traditional Risk Factors in Two Antecedent Case–Control Studies of MI**

Data presented as percent of participants unless otherwise indicated.

|                                      | UCSF       |             | CCF         |            |
|--------------------------------------|------------|-------------|-------------|------------|
|                                      | Cases      | Controls    | Cases       | Controls   |
|                                      | (n=793)    | (n=1000)    | (n=475)     | (n=619)    |
| Male                                 | 61         | 43          | 61          | 62         |
| Age at enrollment, median (range) ,y | 62 (29–86) | 70 (24–100) | 60 (32–86)  | 58 (37–88) |
| Age at MI, median (range) ,y         | 52 (27–76) | NA          | 53 (29–77)* | NA         |
| Smoking                              | 64         | 45          | 73          | 54         |
| Diabetes                             | 20         | 0†          | 38          | 10         |
| Dyslipidemia‡                        | 84         | 53          | 95          | 56         |
| Hypertension§                        | 60         | 34          | 96          | 78         |
| BMI mean ±SD, kg/m <sup>2</sup>      | 28±5       | 26±4        | 31±6        | 30±7       |

Study participants were recruited at the University of California at San Francisco (UCSF) or the Cleveland Clinic Foundation (CCF).

NA indicates not applicable.

\*Data available for 254 cases.

†Individuals with diabetes were excluded from control group.

‡Dyslipidemia was defined in CCF by the use of lipid lowering prescription drug(s), LDL cholesterol >129mg/dL, triglyceride >149 mg/dL or HDL cholesterol <45mg/dL and defined in UCSF by a self-reported history of a physician diagnosis of dyslipidemia or the use of lipid lowering prescription drugs.

§Hypertension was defined in CCF as the use of antihypertensive prescription drug(s), systolic blood pressure >160 mmHg, or diastolic blood pressure >90 mmHg and was defined in UCSF by a self-reported history of a physician diagnosis of hypertension or use of antihypertensive prescription drugs.



**Online Data Supplement: Table III. 74 SNPs Tested in CHS**

| Gene           | SNP*       | African Americans |        | Whites |         |
|----------------|------------|-------------------|--------|--------|---------|
|                |            | Allele            | HWE P- | Allele | HWE P-  |
|                |            | freq.             | Value§ | freq.  | Value§  |
| <i>ABCG2</i>   | rs2231137  | 0.95              | 1      | 0.95   | 0.15    |
| <i>ADAMTS1</i> | rs428785   | 0.10              | 0.99   | 0.23   | 0.26    |
| <i>ADAMTS1</i> | rs402007   | 0.10              | 0.51   | 0.23   | 0.01    |
| <i>ALOX12B</i> | rs3027309  | 0.08              | 1      | 0.19   | 0.02    |
| <i>AP3B1</i>   | rs6453373  | 0.95              | 1      | 0.93   | 0.55    |
| <i>AQP10</i>   | rs6685323  | 0.30              | 0.46   | 0.29   | 0.36    |
| <i>BAT2</i>    | rs11538264 | 0.91              | 0.16   | 0.97   | <0.0001 |
| <i>CALM1</i>   | rs3814843  | 0.02              | 0.18   | 0.04   | 0.19    |
| <i>COG2</i>    | rs1051038  | 0.79              | 0.56   | 0.79   | 0.15    |
| <i>CYBRD1</i>  | rs10455    | 0.88              | 0.27   | 0.67   | 0.11    |
| <i>CYP17A1</i> | rs2486758  | 0.08              | 0.79   | 0.21   | 0.7     |
| <i>CYP2C8</i>  | rs10509681 | 0.98              | 1      | 0.89   | 0.5     |
| <i>DCC</i>     | rs1675225  | 0.97              | 1      | 0.89   | 0.05    |
| <i>DMXL2</i>   | rs12102203 | 0.47              | 0.47   | 0.51   | 0.49    |
| <i>EDG1</i>    | rs2038366  | 0.74              | 0.28   | 0.66   | 0.38    |
| <i>EIF2AK2</i> | rs2307469  | 0.02              | 1      | 0.03   | 1       |
| <i>F13A1</i>   | rs5985     | 0.20              | 0.25   | 0.25   | 0.65    |

| Gene             | SNP*       | African Americans |        | Whites |        |
|------------------|------------|-------------------|--------|--------|--------|
|                  |            | Allele            | HWE P- | Allele | HWE P- |
|                  |            | freq.             | Value§ | freq.  | Value§ |
| <i>FABP2</i>     | rs1799883  | 0.23              | 0.48   | 0.26   | 0.86   |
| <i>FCAR</i>      | rs11666735 | 0.05              | 1      | 0.08   | 0.54   |
| <i>FCRLM2</i>    | rs34868416 | 0.03              | 0.4    | 0.09   | 0.15   |
| <i>FSTL4</i>     | rs13183672 | 0.77              | 0.99   | 0.76   | 0.82   |
| <i>FSTL4</i>     | rs3749817  | 0.90              | 0.2    | 0.78   | 0.93   |
| <i>GJA4</i>      | rs1764391  | 0.47              | 0.04   | 0.69   | 0.92   |
| <i>GRM8</i>      | rs3808117  | 0.86              | 0.15   | 0.79   | 0.19   |
| <i>HPS1</i>      | rs2296436  | 0.87              | 0.36   | 0.91   | 0.74   |
| <i>HPS1</i>      | rs1804689  | 0.16              | 0.02   | 0.30   | 0.75   |
| <i>IL1F10</i>    | rs6761276  | 0.42              | 0.33   | 0.42   | 0.15   |
| <i>IL1F5</i>     | rs2515401  | 0.31              | 0.4    | 0.38   | 0.98   |
| <i>ITGAE</i>     | rs220479   | 0.95              | 0.04   | 0.82   | 0.17   |
| <i>K6IRS4</i>    | rs592720   | 0.95              | 0.7    | 0.74   | 0.72   |
| <i>KIAA1414</i>  | 2:37139448 | 0.20              | 0.68   | 0.06   | 0.23   |
| <i>KIF6</i>      | rs20455    | 0.79              | 0.17   | 0.36   | 0.81   |
| <i>KRT5</i>      | rs89962    | 0.11              | 0.22   | 0.43   | 0.57   |
| <i>LGALS14</i>   | rs35541195 | 0.06              | 0.72   | 0.12   | 0.74   |
| <i>LOC391102</i> | rs943133   | 0.09              | 0.05   | 0.27   | 0.22   |
| <i>LOC651870</i> | rs3130210  | 0.39              | 0.46   | 0.22   | 0.79   |

| Gene             | SNP*       | African Americans |        | Whites |         |
|------------------|------------|-------------------|--------|--------|---------|
|                  |            | Allele            | HWE P- | Allele | HWE P-  |
|                  |            | freq.             | Value§ | freq.  | Value§  |
| <i>LOC651870</i> | rs3129196  | 0.39              | 0.46   | 0.22   | 0.86    |
| <i>LPA</i>       | rs3798220  | 0.01              | 1      | 0.01   | 0.46    |
| <i>LY6G5B</i>    | rs11758242 | 0.89              | 0.38   | 0.96   | <0.0001 |
| <i>MCM10</i>     | rs7905784  | 0.11              | 0.31   | 0.15   | 0.84    |
| <i>MKI67</i>     | rs11016076 | 0.67              | 0.59   | 0.81   | 0.76    |
| <i>MKI67</i>     | rs10082504 | 0.92              | 0.57   | 0.89   | 0.96    |
| <i>MLF1</i>      | rs4875     | 0.70              | 0.68   | 0.54   | 0.33    |
| <i>MYH15</i>     | rs3900940  | 0.17              | 0.54   | 0.29   | 0.46    |
| <i>MYOM3</i>     | rs12145360 | 0.84              | 0.17   | 0.85   | 0.32    |
| <i>OR13G1</i>    | rs1151640  | 0.18              | 0.61   | 0.45   | 0.8     |
| <i>OR2A25</i>    | rs2961135  | 0.33              | 0.12   | 0.51   | 0.26    |
| <i>P2RXL1</i>    | rs2277838  | 0.04              | 0.26   | 0.18   | 0.91    |
| <i>PALLD</i>     | rs12510359 | 0.28              | 0.54   | 0.63   | 0.29    |
| <i>PALLD</i>     | rs7439293  | 0.19              | 0.39   | 0.60   | 0.58    |
| <i>PGLYRP2</i>   | rs892145   | 0.42              | 0.21   | 0.36   | 0.63    |
| <i>PGLYRP2</i>   | rs3813135  | 0.37              | 0.005  | 0.37   | 0.29    |
| <i>PON1</i>      | rs662      | 0.67              | 0.34   | 0.30   | 0.91    |
| <i>PRKG1</i>     | rs211070   | 0.86              | 0.93   | 0.95   | 0.35    |
| <i>ROSI</i>      | rs529038   | 0.09              | 0.72   | 0.26   | 0.78    |

| Gene             | SNP*       | African Americans |        | Whites |        |
|------------------|------------|-------------------|--------|--------|--------|
|                  |            | Allele            | HWE P- | Allele | HWE P- |
|                  |            | freq.             | Value§ | freq.  | Value§ |
| <i>ROS1</i>      | rs619203   | 0.10              | 0.72   | 0.26   | 0.74   |
| <i>SERPINA9</i>  | rs17090921 | 0.18              | 0.73   | 0.30   | 0.26   |
| <i>SERPINB8</i>  | rs1944270  | 0.57              | 0.3    | 0.29   | 0.51   |
| <i>SGIP1</i>     | rs1325268  | 0.26              | 0.81   | 0.29   | 0.48   |
| <i>SLC26A8</i>   | rs2295852  | 0.63              | 0.99   | 0.35   | 0.1    |
| <i>SLC39A7</i>   | rs35690712 | 0.99              | 1      | 0.95   | 0.0003 |
| <i>SNX19</i>     | rs2298566  | 0.92              | 0.59   | 0.74   | 0.79   |
| <i>STRN</i>      | rs11685600 | 0.15              | 0.5    | 0.03   | 1      |
| <i>TAF3</i>      | rs4747647  | 0.67              | 0.09   | 0.40   | 0.1    |
| <i>TAS2R50</i>   | rs1376251  | 0.88              | 0.49   | 0.67   | 0.88   |
| <i>TMPRSS11B</i> | rs12331141 | 0.48              | 0.76   | 0.24   | 0.43   |
| <i>TOX</i>       | rs2290526  | 0.03              | 1      | 0.11   | 0.37   |
| <i>VAMP8</i>     | rs1010     | 0.55              | 0.57   | 0.41   | 0.27   |
| <i>VTI1A</i>     | rs11814680 | 0.52              | 0.92   | 0.15   | 0.16   |
| <i>WDR31</i>     | rs10817479 | 0.98              | 1      | 0.94   | 0.23   |
| <i>WDR55</i>     | rs2286394  | 0.08              | 0.78   | 0.22   | 0.98   |
| <i>ZNF132</i>    | rs1122955  | 0.88              | 0.28   | 0.79   | 0.35   |
| None             | rs2213948  | 0.93              | 0.22   | 0.84   | 0.26   |
| None             | rs2477037  | 0.76              | 0.14   | 0.61   | 0.16   |

\*rs number or chromosome location (Build36)

§Hardy-Weinberg equilibrium: P-values from Pearson chi-square tests are shown. If either homozygote frequency was 5 or fewer, an exact test was used. Number of participants: African Americans, 673; whites, 3849.

**Online Data Supplement: Table IV. Association of 74 SNPs with MI in the white participants of CHS.**

| Gene                   | Prespecified model | Adjusted for age and sex |          | Fully adjusted   |          |
|------------------------|--------------------|--------------------------|----------|------------------|----------|
|                        |                    | HR (90% CI)              | <i>P</i> | HR (90% CI)      | <i>P</i> |
| KIF6<br>(rs20455)      | dom                | 1.29 (1.1-1.52)          | 0.004    | 1.29 (1.1-1.52)  | 0.005    |
| PGLYRP2<br>(rs3813135) | dom                | 1.28 (1.09-1.5)          | 0.006    | 1.28 (1.09-1.51) | 0.006    |
| PGLYRP2<br>(rs892145)  | dom                | 1.27 (1.09-1.49)         | 0.006    | 1.27 (1.08-1.49) | 0.007    |
| LPA<br>(rs3798220)     | add                | 1.62 (1.09-2.42)         | 0.022    | 1.46 (0.96-2.24) | 0.069    |
| MCM10<br>(rs7905784)   | add                | 1.19 (1.02-1.37)         | 0.028    | 1.16 (1-1.35)    | 0.048    |
| VAMP8<br>(rs1010)      | dom                | 1.2 (1.02-1.41)          | 0.032    | 1.21 (1.03-1.42) | 0.029    |
| DCC<br>(rs1675225)     | add                | 1.22 (1.02-1.45)         | 0.036    | 1.24 (1.03-1.48) | 0.026    |
| TAS2R50<br>(rs1376251) | add                | 1.13 (1-1.27)            | 0.046    | 1.14 (1.01-1.28) | 0.038    |
| GRM8<br>(rs3808117)    | add                | 1.13 (0.99-1.3)          | 0.061    | 1.16 (1.01-1.33) | 0.036    |
| ROS1<br>(rs619203)     | add                | 1.11 (0.99-1.25)         | 0.071    | 1.1 (0.98-1.25)  | 0.086    |
| ROS1<br>(rs529038)     | add                | 1.1 (0.98-1.24)          | 0.092    | 1.09 (0.97-1.23) | 0.11     |
| ALOX12B<br>(rs3027309) | add                | 1.1 (0.97-1.26)          | 0.11     | 1.12 (0.99-1.28) | 0.071    |
| FABP2<br>(rs1799883)   | add                | 1.09 (0.97-1.23)         | 0.12     | 1.12 (0.99-1.27) | 0.061    |
| MLF1<br>(rs4875)       | add                | 1.07 (0.96-1.19)         | 0.15     | 1.07 (0.96-1.19) | 0.17     |
| IL1F5<br>(rs2515401)   | add                | 1.07 (0.96-1.19)         | 0.17     | 1.06 (0.95-1.18) | 0.21     |
| EDG1<br>(rs2038366)    | add                | 1.07 (0.95-1.2)          | 0.17     | 1.06 (0.94-1.19) | 0.21     |
| FCRLM2<br>(rs34868416) | add                | 1.11 (0.92-1.32)         | 0.18     | 1.1 (0.92-1.33)  | 0.19     |
| STRN<br>(rs11685600)   | add                | 1.14 (0.86-1.52)         | 0.22     | 1.2 (0.9-1.59)   | 0.15     |
| OR13G1                 | dom                | 1.08 (0.91-1.28)         | 0.22     | 1.11 (0.94-1.32) | 0.16     |

| Gene                     | Prespecified model | Adjusted for age and sex |          | Fully adjusted   |          |
|--------------------------|--------------------|--------------------------|----------|------------------|----------|
|                          |                    | HR (90% CI)              | <i>P</i> | HR (90% CI)      | <i>P</i> |
| (rs1151640)<br>LOC391102 | add                | 1.05 (0.93-1.18)         | 0.25     | 1.04 (0.92-1.17) | 0.29     |
| (rs943133)<br>P2RXL1     | add                | 1.06 (0.92-1.21)         | 0.25     | 1.02 (0.89-1.18) | 0.39     |
| (rs2277838)<br>CYP17A1   | add                | 1.05 (0.92-1.2)          | 0.26     | 1.09 (0.95-1.25) | 0.14     |
| (rs2486758)<br>BAT2      | rec                | 1.13 (0.82-1.56)         | 0.26     | 1.18 (0.85-1.63) | 0.20     |
| (rs11538264)<br>WDR55    | add                | 1.05 (0.92-1.19)         | 0.27     | 1.06 (0.93-1.2)  | 0.24     |
| (rs2286394)<br>LY6G5B    | rec                | 1.12 (0.82-1.52)         | 0.28     | 1.17 (0.85-1.61) | 0.21     |
| (rs11758242)<br>KIAA1414 | add                | 1.08 (0.86-1.36)         | 0.28     | 1.12 (0.89-1.41) | 0.21     |
| (chr2:37081301)<br>TAF3  | add                | 1.03 (0.93-1.15)         | 0.30     | 1.02 (0.92-1.14) | 0.36     |
| (rs4747647)<br>ABCG2     | add                | 1.08 (0.84-1.4)          | 0.31     | 1.07 (0.83-1.38) | 0.34     |
| (rs2231137)<br>PRKG1     | add                | 1.06 (0.82-1.38)         | 0.35     | 1.11 (0.85-1.45) | 0.26     |
| (rs211070)<br>GJA4       | add                | 1.03 (0.92-1.16)         | 0.35     | 1.03 (0.92-1.16) | 0.33     |
| (rs1764391)<br>MYOM3     | add                | 1.04 (0.89-1.21)         | 0.35     | 1.04 (0.89-1.21) | 0.35     |
| (rs12145360)<br>HPS1     | add                | 1.05 (0.86-1.27)         | 0.35     | 1.01 (0.83-1.23) | 0.46     |
| (rs2296436)<br>LGALS14   | add                | 1.04 (0.88-1.22)         | 0.36     | 1.04 (0.88-1.23) | 0.35     |
| (rs35541195)<br>EIF2AK2  | add                | 1.06 (0.79-1.43)         | 0.37     | 1.1 (0.82-1.49)  | 0.29     |
| (rs2307469)<br>AQP10     | add                | 1.02 (0.91-1.15)         | 0.38     | 1.03 (0.91-1.16) | 0.35     |
| (rs6685323)<br>ADAMTS1   | add                | 1.02 (0.9-1.16)          | 0.38     | 1.01 (0.89-1.15) | 0.43     |
| (rs428785)<br>CYP2C8     | rec                | 1.03 (0.85-1.25)         | 0.40     | 1 (0.82-1.21)    | 0.51     |
| (rs10509681)<br>ZNF132   | add                | 1.02 (0.89-1.16)         | 0.41     | 1.01 (0.89-1.16) | 0.44     |
| (rs1122955)<br>MKI67     | add                | 1.02 (0.86-1.21)         | 0.43     | 1.03 (0.87-1.23) | 0.38     |
| (rs10082504)<br>DMXL2    | add                | 1.01 (0.91-1.12)         | 0.44     | 1.03 (0.92-1.14) | 0.34     |
| (rs12102203)             |                    |                          |          |                  |          |

| Gene                      | Prespecified model | Adjusted for age and sex |          | Fully adjusted   |          |
|---------------------------|--------------------|--------------------------|----------|------------------|----------|
|                           |                    | HR (90% CI)              | <i>P</i> | HR (90% CI)      | <i>P</i> |
| PON1<br>(rs662)           | add                | 1.01 (0.9-1.14)          | 0.45     | 1 (0.89-1.12)    | 0.52     |
| SERPINB8<br>(rs1944270)   | add                | 1 (0.89-1.13)            | 0.48     | 1.02 (0.9-1.15)  | 0.39     |
| ADAMTS1<br>(rs402007)     | add                | 1 (0.89-1.14)            | 0.48     | 0.99 (0.87-1.12) | 0.55     |
| KRT5<br>(rs89962)         | add                | 1 (0.89-1.11)            | 0.51     | 0.99 (0.89-1.11) | 0.56     |
| TOX<br>(rs2290526)        | add                | 0.99 (0.83-1.18)         | 0.54     | 0.97 (0.81-1.16) | 0.61     |
| AP3B1<br>(rs6453373)      | add                | 0.98 (0.79-1.21)         | 0.56     | 0.99 (0.8-1.22)  | 0.54     |
| K6IRS4<br>(rs592720)      | add                | 0.98 (0.86-1.1)          | 0.63     | 0.96 (0.85-1.09) | 0.69     |
| MYH15<br>(rs3900940)      | rec                | 0.94 (0.71-1.25)         | 0.64     | 0.98 (0.74-1.29) | 0.56     |
| SNX19<br>(rs2298566)      | rec                | 0.97 (0.83-1.13)         | 0.64     | 0.97 (0.83-1.13) | 0.62     |
| FCAR<br>(rs11666735)      | dom                | 0.95 (0.77-1.17)         | 0.67     | 0.92 (0.75-1.14) | 0.74     |
| None<br>(rs2477037)       | add                | 0.97 (0.87-1.08)         | 0.68     | 0.98 (0.88-1.1)  | 0.59     |
| FSTL4<br>(rs3749817)      | add                | 0.96 (0.84-1.09)         | 0.70     | 0.99 (0.87-1.13) | 0.55     |
| MKI67<br>(rs11016076)     | add                | 0.96 (0.84-1.09)         | 0.71     | 0.96 (0.83-1.1)  | 0.71     |
| ITGAE<br>(rs220479)       | add                | 0.95 (0.83-1.09)         | 0.73     | 0.97 (0.85-1.11) | 0.64     |
| COG2<br>(rs1051038)       | add                | 0.95 (0.83-1.09)         | 0.73     | 0.93 (0.82-1.07) | 0.81     |
| OR2A25<br>(rs2961135)     | add                | 0.95 (0.85-1.06)         | 0.78     | 0.95 (0.86-1.06) | 0.77     |
| VTI1A<br>(rs11814680)     | add                | 0.93 (0.79-1.08)         | 0.79     | 0.95 (0.81-1.11) | 0.72     |
| TMPRSS11B<br>(rs12331141) | add                | 0.93 (0.82-1.06)         | 0.83     | 0.94 (0.83-1.07) | 0.79     |
| SGIP1<br>(rs1325268)      | add                | 0.93 (0.83-1.05)         | 0.83     | 0.93 (0.82-1.05) | 0.85     |
| FSTL4<br>(rs13183672)     | add                | 0.93 (0.82-1.05)         | 0.84     | 0.95 (0.84-1.08) | 0.73     |
| SLC39A7<br>(rs35690712)   | add                | 0.86 (0.68-1.08)         | 0.86     | 0.89 (0.71-1.12) | 0.80     |
| WDR31                     | add                | 0.86 (0.7-1.07)          | 0.87     | 0.89 (0.71-1.1)  | 0.82     |



| Gene                     | Prespecified model | Adjusted for age and sex |          | Fully adjusted   |          |
|--------------------------|--------------------|--------------------------|----------|------------------|----------|
|                          |                    | HR (90% CI)              | <i>P</i> | HR (90% CI)      | <i>P</i> |
| (rs10817479)<br>SERPINA9 | rec                | 0.83 (0.62-1.1)          | 0.87     | 0.8 (0.6-1.06)   | 0.90     |
| (rs17090921)<br>None     | add                | 0.9 (0.78-1.03)          | 0.90     | 0.9 (0.78-1.04)  | 0.88     |
| (rs2213948)<br>LOC651870 | add                | 0.9 (0.79-1.03)          | 0.90     | 0.91 (0.79-1.04) | 0.89     |
| (rs3130210)<br>IL1F10    | add                | 0.92 (0.83-1.03)         | 0.90     | 0.92 (0.83-1.03) | 0.89     |
| (rs6761276)<br>LOC651870 | add                | 0.9 (0.79-1.03)          | 0.91     | 0.9 (0.79-1.03)  | 0.89     |
| (rs3129196)<br>HPS1      | dom                | 0.87 (0.75-1.02)         | 0.93     | 0.87 (0.75-1.02) | 0.93     |
| (rs1804689)<br>F13A1     | add                | 0.89 (0.78-1.01)         | 0.93     | 0.85 (0.75-0.97) | 0.98     |
| (rs5985)<br>CALM1        | add                | 0.77 (0.58-1.02)         | 0.94     | 0.8 (0.61-1.06)  | 0.91     |
| (rs3814843)<br>PALLD     | add                | 0.9 (0.81-1.01)          | 0.94     | 0.91 (0.81-1.01) | 0.93     |
| (rs7439293)<br>PALLD     | rec                | 0.86 (0.74-1.01)         | 0.94     | 0.86 (0.74-1.01) | 0.94     |
| (rs12510359)<br>SLC26A8  | add                | 0.89 (0.79-1)            | 0.95     | 0.89 (0.79-1)    | 0.95     |
| (rs2295852)<br>CYBRD1    | add                | 0.88 (0.79-0.98)         | 0.97     | 0.88 (0.78-0.98) | 0.98     |
| (rs10455)                |                    |                          |          |                  |          |

**Online supplement Table V. Association of 74 SNPs with MI in the African American participants of CHS.**

| Gene (SNP)                | Adjusted for age and sex |       | Fully adjusted     |       |
|---------------------------|--------------------------|-------|--------------------|-------|
|                           | HR (90% CI)              | P     | HR (90% CI)        | P     |
| FCAR<br>(rs11666735)      | 2.08 (1.23-3.53)         | 0.01  | 2.21 (1.29-3.79)   | 0.008 |
| None<br>(rs2213948)       | 2.38 (1.04-5.43)         | 0.042 | 20.51 (1.08-50.82) | 0.036 |
| AQP10<br>(rs6685323)      | 1.35 (1-1.82)            | 0.048 | 1.4 (1.03-1.91)    | 0.034 |
| PALLD<br>(rs12510359)     | 1.78 (0.98-3.22)         | 0.055 | 1.3 (0.67-20.54)   | 0.26  |
| GJA4<br>(rs1764391)       | 1.29 (0.97-1.71)         | 0.074 | 1.23 (0.91-1.65)   | 0.13  |
| VAMP8<br>(rs1010)         | 1.71 (0.92-3.19)         | 0.078 | 1.81 (0.93-3.52)   | 0.07  |
| TMPRSS11B<br>(rs12331141) | 1.29 (0.96-1.72)         | 0.078 | 1.31 (0.97-1.77)   | 0.069 |
| KIF6<br>(rs20455)         | 4.14 (0.79-21.77)        | 0.08  | NA*                |       |
| VTI1A<br>(rs11814680)     | 1.29 (0.95-1.73)         | 0.083 | 1.27 (0.93-1.73)   | 0.10  |
| DCC<br>(rs1675225)        | 3.82 (0.73-20.1)         | 0.092 | 3.81 (0.72-20.2)   | 0.09  |
| CALM1<br>(rs3814843)      | 1.77 (0.77-4.05)         | 0.13  | 1.55 (0.66-3.64)   | 0.20  |
| COG2<br>(rs1051038)       | 1.28 (0.88-1.87)         | 0.14  | 1.31 (0.89-1.93)   | 0.13  |
| TAF3<br>(rs4747647)       | 1.24 (0.89-1.73)         | 0.14  | 1.33 (0.94-1.87)   | 0.087 |
| MYH15<br>(rs3900940)      | 1.87 (0.7-5.01)          | 0.15  | 2.24 (0.83-6.06)   | 0.091 |
| SERPINB8<br>(rs1944270)   | 1.22 (0.89-1.65)         | 0.15  | 1.24 (0.91-1.7)    | 0.13  |
| F13A1<br>(rs5985)         | 1.23 (0.87-1.74)         | 0.16  | 1.32 (0.92-1.88)   | 0.10  |
| IL1F10<br>(rs6761276)     | 1.18 (0.89-1.57)         | 0.16  | 1.15 (0.86-1.53)   | 0.22  |
| EDG1<br>(rs2038366)       | 1.2 (0.85-1.7)           | 0.19  | 1.23 (0.86-1.76)   | 0.18  |
| ZNF132<br>(rs1122955)     | 1.24 (0.78-1.99)         | 0.22  | 1.25 (0.78-2)      | 0.22  |
| GRM8<br>(rs3808117)       | 1.22 (0.78-1.9)          | 0.23  | 1.17 (0.72-1.88)   | 0.30  |

| Gene (SNP)              | Adjusted for age and sex |      | Fully adjusted    |      |
|-------------------------|--------------------------|------|-------------------|------|
|                         | HR (90% CI)              | P    | HR (90% CI)       | P    |
| CYBRD1<br>(rs10455)     | 1.25 (0.76-2.05)         | 0.23 | 1.19 (0.72-1.97)  | 0.29 |
| LOC391102<br>(rs943133) | 1.22 (0.75-1.98)         | 0.25 | 1.28 (0.79-2.08)  | 0.20 |
| FSTL4<br>(rs3749817)    | 1.24 (0.73-2.13)         | 0.25 | 1.43 (0.81-20.53) | 0.15 |
| MLF1<br>(rs4875)        | 1.14 (0.82-1.59)         | 0.26 | 1.11 (0.79-1.56)  | 0.30 |
| PGLYRP2<br>(rs3813135)  | 1.18 (0.76-1.83)         | 0.27 | 1.4 (0.88-2.22)   | 0.12 |
| FABP2<br>(rs1799883)    | 1.12 (0.81-1.55)         | 0.28 | 1.17 (0.84-1.63)  | 0.22 |
| P2RXL1<br>(rs2277838)   | 1.24 (0.63-2.43)         | 0.30 | 1.21 (0.61-2.38)  | 0.33 |
| FSTL4<br>(rs13183672)   | 1.12 (0.78-1.6)          | 0.31 | 1.13 (0.78-1.63)  | 0.30 |
| LPA<br>(rs3798220)      | 1.55 (0.29-8.21)         | 0.33 | 1.75 (0.33-9.36)  | 0.29 |
| HPS1<br>(rs2296436)     | 1.11 (0.71-1.74)         | 0.35 | 1.03 (0.66-1.62)  | 0.46 |
| K6IRS4<br>(rs592720)    | 1.16 (0.58-2.32)         | 0.36 | 1.17 (0.58-2.37)  | 0.36 |
| SNX19<br>(rs2298566)    | 1.1 (0.63-1.94)          | 0.39 | 1.09 (0.62-1.93)  | 0.40 |
| TAS2R50<br>(rs1376251)  | 1.04 (0.66-1.62)         | 0.45 | 0.99 (0.63-1.54)  | 0.52 |
| MKI67<br>(rs11016076)   | 1.02 (0.74-1.4)          | 0.46 | 1.05 (0.76-1.46)  | 0.41 |
| PRKG1<br>(rs211070)     | 1.02 (0.67-1.56)         | 0.47 | 0.92 (0.6-1.41)   | 0.62 |
| IL1F5<br>(rs2515401)    | 1.01 (0.74-1.39)         | 0.47 | 0.98 (0.71-1.37)  | 0.53 |
| CYP17A1<br>(rs2486758)  | 1.02 (0.59-1.76)         | 0.48 | 1.05 (0.61-1.82)  | 0.44 |
| CYP2C8<br>(rs10509681)  | NA*                      |      | NA*               |      |
| ITGAE<br>(rs220479)     | NA*                      |      | NA*               |      |
| SLC39A7<br>(rs35690712) | 0.96 (0.18-5.04)         | 0.52 | 1.13 (0.21-6.07)  | 0.45 |
| PON1<br>(rs662)         | 0.97 (0.72-1.31)         | 0.56 | 0.98 (0.72-1.34)  | 0.54 |
| SGIP1<br>(rs1325268)    | 0.96 (0.69-1.35)         | 0.58 | 0.92 (0.65-1.31)  | 0.65 |

| Gene (SNP)                  | Adjusted for age and sex |      | Fully adjusted   |      |
|-----------------------------|--------------------------|------|------------------|------|
|                             | HR (90% CI)              | P    | HR (90% CI)      | P    |
| PGLYRP2<br>(rs892145)       | 0.95 (0.62-1.46)         | 0.58 | 1.14 (0.73-1.8)  | 0.31 |
| WDR31<br>(rs10817479)       | 0.89 (0.34-2.35)         | 0.58 | 1.29 (0.39-4.26) | 0.36 |
| OR13G1<br>(rs1151640)       | 0.94 (0.6-1.46)          | 0.60 | 1.07 (0.68-1.68) | 0.41 |
| ABCG2<br>(rs2231137)        | 0.88 (0.46-1.67)         | 0.63 | 0.83 (0.43-1.58) | 0.69 |
| EIF2AK2<br>(rs2307469)      | 0.81 (0.31-2.14)         | 0.64 | 0.94 (0.35-20.5) | 0.54 |
| HPS1<br>(rs1804689)         | 0.9 (0.57-1.42)          | 0.65 | 0.92 (0.57-1.48) | 0.61 |
| AP3B1<br>(rs6453373)        | 0.84 (0.44-1.6)          | 0.68 | 0.76 (0.4-1.46)  | 0.75 |
| FCRLM2<br>(rs34868416)      | 0.76 (0.29-1.96)         | 0.68 | 0.69 (0.26-1.8)  | 0.74 |
| KRT5<br>(rs89962)           | 0.83 (0.52-1.33)         | 0.74 | 0.79 (0.49-1.29) | 0.79 |
| DMXL2<br>(rs12102203)       | 0.88 (0.66-1.19)         | 0.76 | 0.88 (0.65-1.2)  | 0.75 |
| LGALS14<br>(rs35541195)     | 0.72 (0.34-1.54)         | 0.76 | 0.74 (0.35-1.59) | 0.74 |
| LOC651870<br>(rs3130210)    | 0.87 (0.64-1.19)         | 0.76 | 0.92 (0.67-1.27) | 0.66 |
| LOC651870<br>(rs3129196)    | 0.87 (0.64-1.19)         | 0.76 | 0.92 (0.67-1.27) | 0.66 |
| TOX<br>(rs2290526)          | 0.59 (0.18-1.94)         | 0.77 | 0.63 (0.19-2.09) | 0.74 |
| ALOX12B<br>(rs3027309)      | 0.76 (0.41-1.39)         | 0.77 | 0.77 (0.42-1.41) | 0.76 |
| WDR55<br>(rs2286394)        | 0.76 (0.42-1.37)         | 0.78 | 0.83 (0.45-1.51) | 0.70 |
| KIAA1414<br>(chr2:37081301) | 0.83 (0.57-1.22)         | 0.78 | 0.85 (0.57-1.27) | 0.74 |
| SLC26A8<br>(rs2295852)      | 0.87 (0.64-1.16)         | 0.79 | 0.85 (0.62-1.15) | 0.81 |
| SERPINA9<br>(rs17090921)    | 0.44 (0.08-2.3)          | 0.79 | 0.47 (0.09-20.5) | 0.77 |
| LY6G5B<br>(rs11758242)      | 0.78 (0.49-1.26)         | 0.80 | 0.81 (0.5-1.31)  | 0.77 |
| MCM10<br>(rs7905784)        | 0.75 (0.45-1.24)         | 0.83 | 0.68 (0.4-1.16)  | 0.88 |
| OR2A25<br>(rs2961135)       | 0.82 (0.59-1.14)         | 0.83 | 0.79 (0.56-1.11) | 0.88 |

| <b>Gene (SNP)</b>     | <b>Adjusted for age and sex</b> |          | <b>Fully adjusted</b> |          |
|-----------------------|---------------------------------|----------|-----------------------|----------|
|                       | <b>HR (90% CI)</b>              | <b>P</b> | <b>HR (90% CI)</b>    | <b>P</b> |
| MYOM3<br>(rs12145360) | 0.78 (0.53-1.15)                | 0.85     | 0.75 (0.51-1.1)       | 0.89     |
| PALLD<br>(rs7439293)  | 0.75 (0.51-1.12)                | 0.88     | 0.64 (0.41-0.98)      | 0.96     |
| BAT2<br>(rs11538264)  | 0.68 (0.42-1.1)                 | 0.91     | 0.69 (0.42-1.12)      | 0.90     |
| ADAMTS1<br>(rs402007) | 0.61 (0.34-1.12)                | 0.91     | 0.66 (0.36-1.22)      | 0.87     |
| MKI67<br>(rs10082504) | 0.66 (0.4-1.08)                 | 0.92     | 0.64 (0.39-1.06)      | 0.93     |
| STRN<br>(rs11685600)  | 0.65 (0.4-1.06)                 | 0.93     | 0.72 (0.44-1.18)      | 0.86     |
| ROS1<br>(rs619203)    | 0.58 (0.32-1.05)                | 0.94     | 0.53 (0.28-1)         | 0.95     |
| ROS1<br>(rs529038)    | 0.54 (0.28-1.02)                | 0.94     | 0.49 (0.25-0.98)      | 0.96     |
| ADAMTS1<br>(rs428785) | 0.51 (0.27-0.96)                | 0.96     | 0.55 (0.29-1.05)      | 0.94     |
| None<br>(rs2477037)   | 0.63 (0.46-0.88)                | 0.99     | 0.6 (0.43-0.84)       | 0.99     |

\*HR could not be estimated because there were no incident events in the risk genotype or in the nonrisk genotype groups.
